# Supplementary material
Source: PubMed Central journal article supplement (PMC4687906)
Supplement: NIHMS742197-supplement-Supplementary_materials.pdf [file NIHMS742197-supplement-Supplementary_materials.pdf]

## Supplementary Materials for **Drug-induced regeneration in adult mice**

Yong Zhang, Iossif Strehin, Khamilia Bedelbaeva, Dmitri Gourevitch, Lise Clark,  
John Leferovich, Phillip B. Messersmith, Ellen Heber-Katz\*

\*Corresponding author. E-mail: heberkatz@limr.org

Published 3 June 2015, *Sci. Transl. Med.* **7**, 290ra92 (2015)  
DOI: 10.1126/scitranslmed.3010228

### **The PDF file includes:**

#### Materials and Methods

Fig. S1. Knockdown of *Hif1a* in B6 and Swiss Webster mouse ear fibroblasts.

Fig. S2. Effects of Pluronic F127 on microcrystal growth and stability.

Fig. S3. HIF-1 $\alpha$  target genes and dedifferentiation marker genes up-regulated by 1,4-DPCA/gel were blocked by knockdown of *Hif1a*.

Fig. S4. HIF-2 $\alpha$  is not affected by the 1,4-DPCA drug/gel construct in vitro.

Fig. S5. Distal and long-term effects and survival of drug/gel-treated Swiss Webster mice.

Fig. S6. Inflammatory responses are affected by 1,4-DPCA treatment.

Fig. S7. Synthesis of 1,4-DPCA.

Table S1. Primer sequences used for RT-PCR.

Table S2. Antibodies used for immunostaining.

Table S3. Raw data and statistical significance testing for Fig. 1.

Table S4. Raw data and statistical significance testing for Fig. 3G.

Table S5. Raw data and statistical significance testing for Fig. 4.

Table S6. Raw data and statistical significance testing for Fig. 5.

Table S7. Raw data and statistical significance testing for Fig. 6.

Table S8. Raw data and statistical significance testing for fig. S5.

References (79–82)

## SUPPLEMENTARY MATERIAL

### MATERIALS AND METHODS

#### Hydrogel and Drug Preparation

##### **Synthesis of 1,4-DPCA (see Supplemental Figure S7).**

**Diethyl[(quinolin-8-ylamino)methylidene]propanedioate (1).** **1** was prepared using a modified protocol described previously (79). 8-aminoquinoline (3.31 g, 22.9 mmol) and diethyl ethoxymethylenemalonate (4.63 mL, 22.9 mmol) were heated to 100°C for 1 hour and then cooled to 80°C and 20 mL methanol was added. The crystallized product was washed twice with 20 mL MeOH and dried on high vacuum to afford **1** (5.68g, 18.1 mmol, 79%) as green-brown needles. <sup>1</sup>H NMR (500 MHz, Chloroform-d), δ, ppm (J, Hz): 12.37 (1H, d, <sup>3</sup>J<sub>NH=CH</sub> = 14.3, NH); 8.97 (1H, dd, <sup>3</sup>J<sub>2,3</sub> = 4.3, <sup>4</sup>J<sub>2,4</sub> = 1.7, H-2); 8.80 (1H, d, <sup>3</sup>J<sub>=CH,NH</sub> = 14.3, =CH); 8.18 (1H, dd, <sup>3</sup>J<sub>4,3</sub> = 8.3, <sup>4</sup>J<sub>4,2</sub> = 1.7, H-4); 7.55 (3H, m, H-5,6,7); 7.49 (1H, dd, <sup>3</sup>J<sub>3,4</sub> = 8.3, <sup>3</sup>J<sub>3,2</sub> = 4.2, H-3); 4.42 (2H, q, <sup>3</sup>J<sub>OCH<sub>2</sub>,CH<sub>3</sub></sub> = 7.1, (Z)-ester OCH<sub>2</sub>); 4.30 (2H, q, <sup>3</sup>J<sub>OCH<sub>2</sub>,CH<sub>3</sub></sub> = 7.1, (E)-ester OCH<sub>2</sub>); 1.44 (3H, t, <sup>3</sup>J<sub>CH<sub>3</sub>,OCH<sub>2</sub></sub> = 7.1, (Z)-ester CH<sub>3</sub>); 1.37 (3H, t, <sup>3</sup>J<sub>CH<sub>3</sub>,OCH<sub>2</sub></sub> = 7.1, (E)-ester CH<sub>3</sub>).

**Ethyl 4-oxo-1,4-dihydro-1,10-phenanthroline-3-carboxylate (2).** **2** was prepared using a modified protocol described previously (79). **1** (5.50 g, 17.5 mmol) was added to diphenylether (55 mL) and refluxed (250°C) for 1 hour, then cooled to room temperature and collected through filtration. The precipitate was triturated twice with 25 mL petroleum ether (b.p. 80-110°C) followed by washing with 10 mL of cold Et<sub>2</sub>O. The precipitate was dried on high vacuum overnight to afford **2** (2.05 g, 7.65 mmol, 44%) as a beige powder. <sup>1</sup>H NMR spectrum (500 MHz, DMSO-d<sub>6</sub>), δ, ppm (J, Hz): 12.88 (1H, s, NH); 9.10 (1H, dd, <sup>3</sup>J<sub>2,3</sub> = 4.3, <sup>4</sup>J<sub>2,4</sub> = 1.6, H-2); 8.57 (1H, dd, <sup>3</sup>J<sub>4,3</sub> = 8.3, <sup>4</sup>J<sub>4,2</sub> = 1.6, H-4); 8.54 (1H, s, H-8); 8.22 (1H, d, <sup>3</sup>J<sub>6,5</sub> = 8.8, H-6); 7.90 (1H, d, <sup>3</sup>J<sub>5,6</sub> = 8.8, CH, i); 7.84 (1H, dd, <sup>3</sup>J<sub>3,4</sub> = 8.3, <sup>3</sup>J<sub>3,2</sub> = 4.3, H-3); 4.25 (2H, q, <sup>3</sup>J<sub>OCH<sub>2</sub>,CH<sub>3</sub></sub> = 7.1, OCH<sub>2</sub>); 1.30 (3H, t, <sup>3</sup>J<sub>CH<sub>3</sub>,OCH<sub>2</sub></sub> = 7.1, CH<sub>3</sub>).

**1,4-dihydrophenanthroline-4-one-3-carboxylic acid (1,4-DPCA) (3).** **3** was prepared using a modified protocol described previously (79). **2** (2.00 g, 7.46 mmol) was combined with 40 mL 10% (w/v) KOH and refluxed (110°C) for 1 hour, allowed to cool to room temperature, and residual diphenyl ether extracted using 28 mL petroleum ether (b.p. 80-110°C). The product was precipitated with 40 mL 10% (w/v) HCl, filtered, washed with dH<sub>2</sub>O and dried under high vacuum overnight to afford **3** (1.65 g, 6.87 mmol, 92%) as a beige powder. <sup>1</sup>H NMR spectrum (500 MHz, DMSO-d<sub>6</sub>), δ, ppm (J, Hz): 15.44 (1H, s, OH); 13.85 (1H, s, NH); 9.16 (1H, dd, <sup>3</sup>J<sub>2,3</sub> = 4.3, <sup>3</sup>J<sub>2,4</sub> = 1.6, H-2); 8.73 (1H, s, H-8); 8.64 (1H, dd, <sup>3</sup>J<sub>4,3</sub> = 8.3, <sup>4</sup>J<sub>4,2</sub> = 1.6, H-4); 8.26 (1H, d, <sup>3</sup>J<sub>6,5</sub> = 8.8, H-6); 8.04 (1H, d, <sup>3</sup>J<sub>5,6</sub> = 8.8, H-5); 7.92 (1H, dd, <sup>3</sup>J<sub>3,4</sub> = 8.3, <sup>3</sup>J<sub>3,2</sub> = 4.3, CH, k). Mass spectrum, m/z (I<sub>rel</sub>, %): 241.1 [MH]<sup>+</sup> (18), 263.0 (100), 279.0 (30), 503.1 (41). Purity was estimated as 99.8% by HPLC (C<sub>18</sub>, 10 μm, 4.6x250 mm, 300Å pores, silica; 2-100%, 30 min, acetonitrile gradient, 0.1% TFA; elution time = 18.5 minutes; UV-vis, λ<sub>max</sub>, nm: 261, 316, 331, 346).

**Synthesis of Glutaric Acid Terminated 8 Arm PEG (P8G).** Glutaric acid terminated PEG was synthesized as described previously (39). Briefly, 8-arm PEG-OH (19.4 g, 7.74 mmol OH) and glutaric anhydride (4.49 g, 38.7 mmol) were dissolved in chloroform (20 mL). Pyridine (3.12 mL, 38.7 mmol) was added dropwise, and the reaction mixture was refluxed at 82 °C for 24 hours under inert air. The product was precipitated with cold diethyl ether (200 mL) and spun down. The supernatant was decanted and the product re-dissolved in MeOH (200 mL). After incubation at -20 °C for 1 hour, the precipitate was centrifuged at -5 °C. The supernatant was discarded, and the MeOH wash procedure was repeated twice more. Following cold diethyl ether precipitations (400 mL), the product was collected and dried under high vacuum overnight to afford a white powder (92% yield, 100% conversion). <sup>1</sup>H NMR (500MHz, Chloroform-d), δ, ppm: 4.24 (16H, t, terminal PEG CH<sub>2</sub>), 3.64 (1823H, m, backbone PEG CH<sub>2</sub>), 2.43 (16H, t, H-2 of glutaric acid), 2.39 (16H, t, H-4 of glutaric acid), 1.96 (16H, p, H-3 of glutaric acid).

**Synthesis of N-Hydroxysuccinimide Terminated 8 Arm PEG (P8NHS).** NHS terminated 8 arm PEG was synthesized as described previously (39). P8G (18.6 g, 7.10 mmol COOH), NHS (8.18 g, 71.0 mmol) and

EDC (13.6 g, 71.0 mmol) were dissolved in DMSO (47 mL). The solution was agitated for 30 minutes at room temperature, then it was diluted with MeOH (200 mL), precipitated at -20 °C for 1 hour, and spun down at -5 °C. The supernatant was decanted, and the MeOH wash procedure was repeated twice more with 400 mL MeOH per wash. Following cold diethyl ether precipitations (400 mL), the product was dried under high vacuum to afford a white powder (95% yield, 96% conversion). <sup>1</sup>H NMR (500MHz, Chloroform-d), δ, ppm: 4.24 (16H, t, terminal PEG CH<sub>2</sub>), 3.63 (1823H, m, backbone PEG CH<sub>2</sub>), 2.84 (32H, m, NHS protons), 2.71 (16H, t, H-4 of glutaric acid), 2.49 (16H, t, H-2 of glutaric acid), 2.06 (16H, p, H-3 of glutaric acid).

**Synthesis of Cysteine Terminated 8 Arm PEG (P8Cys).** Cysteine terminated 8 arm PEG was synthesized as described previously (39). PEG-NH<sub>2</sub> (20 g, 8.12 mmol NH<sub>2</sub>) was dissolved in DMF (40 mL) after which DIEA was added dropwise (1.41 mL, 8.12 mmol). In a separate reaction vessel, Boc-Cys(Trt)-OH (15.0 g, 32.5 mmol) and BOP (14.4 g, 32.5 mmol) were dissolved in DMF (40 mL) and DIEA (5.65 mL, 32.5 mmol) was added dropwise. Both solutions were combined, and the coupling reaction was allowed to proceed at room temperature for 18 hours. Following precipitation in cold diethyl ether (400 mL), the product was re-dissolved in MeOH (40 mL) and precipitated in cold diethyl ether once more (400 mL). The cysteine was deprotected with TFA:TIS:EDT (300 mL, 95:2.5:2.5) cleavage solution at room temperature for 4 hours. TFA was evaporated under low pressure, and the product was precipitated in cold diethyl ether (400 mL). P8Cys was dissolved in MeOH (200 mL), precipitated at -20 °C overnight, and centrifuged at -5 °C. The supernatant was decanted and the MeOH precipitation was repeated twice more using 100 mL MeOH per wash. Following diethyl ether precipitations (200 mL), the product was dried under high vacuum overnight to afford a white powder (73% yield, 84% endgroup conversion). <sup>1</sup>H NMR (500MHz, Acetic Acid-d<sub>4</sub>), δ, ppm: 4.41 (8H, t, α-C cysteine), 3.68 (1790H, m, backbone PEG CH<sub>2</sub>), 3.13 (16H, d, CH<sub>2</sub> cysteine).

**Preparation of 1,4-DPCA Microcrystals.** 1.35 g Pluronic F127NF and 100 mg 1,4-DPCA were dissolved in 10 mL DMF. With stirring, the F127NF/1,4-DPCA solution was added dropwise to 500 mL ddH<sub>2</sub>O at 60°C to form microcrystals. The resulting microcrystals were collected by filtration and washed twice with 200 mL 0.27% (w/v) F127NF in ddH<sub>2</sub>O. The microcrystals were re-suspended in 0.27% (w/v) F127NF in ddH<sub>2</sub>O and lyophilized to afford a white powder of F127NF/1,4-DPCA drug microcrystals. HPLC (C<sub>18</sub>, 10 μm, 4.6x250 mm, 300Å pores, silica; 2-100%, 30 min, acetonitrile gradient, 0.1% TFA; elution time = 18.5 minutes) was used to quantify the drug content. The amount of 1,4-DPCA in the drug microcrystals showed batch to batch variation within the range of 35-53%.

**Filter Sterilization of PEG Polymers.** A 10% (w/v) solution of each PEG polymer in MeOH was filtered through a 0.2 μm filter into a sterile receptacle. The product was lyophilized to yield filter sterilized P8NHS or P8Cys.

**Formation of Drug-Loaded Hydrogels.** Separately, 10% (w/v) solutions of P8NHS and P8Cys were prepared in phosphate buffered saline (PBS) suspension of DCs at the desired drug concentration. The two polymer solutions were then mixed in a 1:1 v/v ratio and left undisturbed for 20 minutes to yield 70 μL cylindrical hydrogels (n = 3).

**In-Vitro Drug Release from Hydrogels.** Each hydrogel cylinder prepared as described above was immersed in 5 mL PBS and at specified time points transferred into 5 mL of fresh PBS. UV/vis spectrophotometry was used to quantify drug release over time. The standard curve was prepared from stock solutions of known concentration of drug in DMSO. 10 μL of each stock solution was added to 990 μL PBS to yield a standard curve with 100-3000 ng/mL of drug. A PowerWave XS2 microplate spectrophotometer (Biotek Instruments, Inc., Winooski, VT, USA) was used to quantify absorbance at 261 nm. Hydrogels without drug were used as negative controls.

## Gelation Kinetics

Gelation time was quantified using a previously described protocol (39). Briefly, the drug microcrystals were suspended in PBS and used to prepare 10% (w/v) P8NHS and 10% (w/v) P8Cys. The two polymer solutions were then mixed in a 1:1 (v/v) ratio and pipetted up and down using a standard 0.1-10  $\mu$ L pipette tip. The time at which the material blocked the pipette tip was designated as the gelation time. Temperature was controlled at 37°C through the use of a water bath.

### **Cell Viability**

Viability of 3T3 fibroblasts exposed to drug microcrystals was quantified using ISO 10993. Briefly, different dilutions of drug microcrystals in cell culture medium were added to a subconfluent monolayer of 3T3 fibroblasts (n = 3). The cells were cultured for 24 hours at 37°C, 5% CO<sub>2</sub>, and >90% RH and then washed with PBS. Neutral red solution (0.4%) in DMEM was added, and the cells were stained for 3 hours. Following removal of the staining solution and washing the cells with PBS, the cells were destained using 50% ethanol, 49% ddH<sub>2</sub>O and 1% glacial acetic acid. Following 10 minutes of agitation, absorbance was measured at 540 nm and used to quantify cell viability. SDS was used as a positive control as specified by ISO 10993, and the IC<sub>50</sub> was found to be in the acceptable range of values hence confirming the validity of the assay. Culture medium was used as a negative control. Cell culture medium consisted of high glucose DMEM substituted with L-glutamine, penicillin/streptomycin, 10% v/v newborn calf serum and 20 mM HEPES.

### **Tissue Culture**

Primary ear dermal fibroblast-like cells were established from MRL and B6 mice and grown in DMEM-10% FBS supplemented with 2 mM L-glutamine, 100 IU/mL penicillin streptomycin and maintained at 37 °C, 5% CO<sub>2</sub>, and 21% O<sub>2</sub>. Cells were split 1:5 as needed to maintain exponential growth and avoid contact inhibition. Passage numbers were documented and cells from early passages (<P20) frozen in liquid nitrogen and used in the described experiments.

### **Immunohistochemistry**

Tissue from normal ears were fixed with Prefer fixative (the active ingredient is glyoxal) (Anatech) overnight and then washed in H<sub>2</sub>O. Tissue was embedded in paraffin and 5- $\mu$ m thick sections cut. Before staining, slides were dewaxed in xylene and rehydrated. Antigen retrieval was performed by autoclaving for 20 min in 10 mM Sodium Citrate, pH 6.0. Tissue sections were then treated with 3% H<sub>2</sub>O<sub>2</sub> and nonspecific binding was blocked with 4% BSA (A7906; Sigma) for 1 h. The primary antibodies and matched secondary antibodies used for IHC were shown in **Supplemental Table S2**. For immunocytochemistry staining, primary ear skin fibroblasts were grown on coverslips in DMEM with 10% FBS at 37 °C in a humidified 5% CO<sub>2</sub> incubator. The coverslips were rinsed with 1x PBS, the cells were fixed in cold methanol (-20 °C) for 10 min, rinsed with 1x PBS, treated with 0.1% Triton-X100, and then incubated with the appropriate primary and secondary antibodies (Table S2). Photomicrographs were produced using the fluorescent microscope (Olympus AX70) and a Spot camera with bounded software .

For histological stains, tissue sections were treated the same as above and then stained with Hematoxylin (Leica Microsystems, # 3801562) and Eosin (Leica Microsystems, #3801602), Picro-Sirius Red (Poly Scientific, cat. # s2365), Alcian blue (1% in 3% acetic acid (Polyscience, Bay Shore, NY, cat # S111A), or toluidine blue O (Allied Chemical, Morristown, NJ, cat. # NA0652), counterstained with Kernechtrot (Polyscience, Bay Shore, NY, cat # S248). The slides were washed, rehydrated, cleared with Xylene and coverslipped with Permount mounting media (Fisher, SP15-500). Staining was visualized using an Olympus (AX70) microscope in bright field for H&E and under polarized light for Picro-Sirius Red.

For quantitation of IHC or PSR signal, the method used was previously described (16). Briefly, we used ImagePro v4.0 for image analysis by selecting positive staining from multiple areas in the sections. The number of "positive staining" pixels was determined. The area was expressed in square microns and the final data were expressed as IHC staining signal per square micron. The mean of samples examined were plotted and standard errors calculated.

## Western Analysis

Ear tissue samples (3 ear hole donuts/ear from 3 separate mice) were homogenized in radio-immunoprecipitation assay buffer (50mM Tris-HCl pH 7.6, containing 150mM NaCl, 1% Triton X-100, 1% sodium deoxycholate, 1 mM EDTA and 0.1% SDS) with 1 mM PMSF and a protease inhibitor cocktail (Sigma). Samples with equal amounts of protein (about 40 $\mu$ g) were loaded into a NuPAGE 4-12%Bis–Tris gradient gel or 8% Bis–Tris gel (Life Technologies, Grand Island, NY), electrophoresed and then electro-transferred onto a PVDF-FL membrane (Immobilon, Billerica, MA). The membrane was subsequently blocked with Odyssey blocking buffer (LI-COR, Lincoln, NE), probed with primary antibodies (HIF-1 $\alpha$  (10006421, Cayman Chemical, Ann Arbor, MI), HIF-2 $\alpha$  (NB100-132B, Novus, Littleton, CO), Wnt5a (BAF645, R&D System) or  $\alpha$ -Tubulin (Sigma) overnight at 4 $^{\circ}$ C, then further incubated with Alexa Fluor-labeled secondary antibodies (IRDye 800CW goat-anti rat or IRDye 800CW goat-anti rabbit (LI-COR, Lincoln, NE) for 1 hr and scanned using the Odyssey system (LI-COR, Lincoln, NE).

## RNA isolation and Quantitative qPCR.

Total RNA from ear fibroblast-like cells or ear hole donuts was prepared with Qiagen RNeasy kit (Qiagen) according to the manufacturer's guidelines. First strand cDNA was synthesized from 1  $\mu$ g of RNA using the Superscript First-Strand Synthesis System (Invitrogen, Carlsbad, CA) according to the manufacturer's instructions. qPCR was performed with SYBR green PCR Master Mix (Applied Biosystems, Life Technologies). In brief, a 20  $\mu$ l mixture was used containing 10  $\mu$ l SYBR Green PCR master mix, 1  $\mu$ l forward and reverse primer, 6  $\mu$ l sterile water, and 2  $\mu$ l of complementary DNA template. A negative control (non-template control) was performed in each run. The real-time PCR was performed using a Quant Studio 6 Flex (Applied Biosystems) according to the manufacturer's instructions. All data were normalized to 18S rRNA and quantitative measurements were obtained using the  $\Delta\Delta C_T$  method. All primers used are listed with their sequences in **Supplemental Table S1**.

## siHif1a in B6 and SW Cells

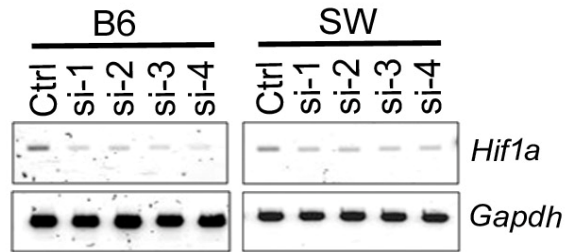

**Supplemental Figure S1. Knockdown of *Hif1a* in B6 and Swiss Webster mouse ear fibroblast cells.** Four siRNA's specific for *Hif1a* (Qiagen) (si-1, SI00193011; si-2, SI00193018; si-3, SI00193025 and si-4, SI00193032) were tested for blocking *Hif1a* mRNA in vitro on C57BL/6 (B6) or Swiss Webster (SW) ear fibroblast cells. siHif1a\_3 was the only effective inhibitor in all three strains tested including MRL (see **Fig. 1G**) with *Gapdh* as a control for all strains.

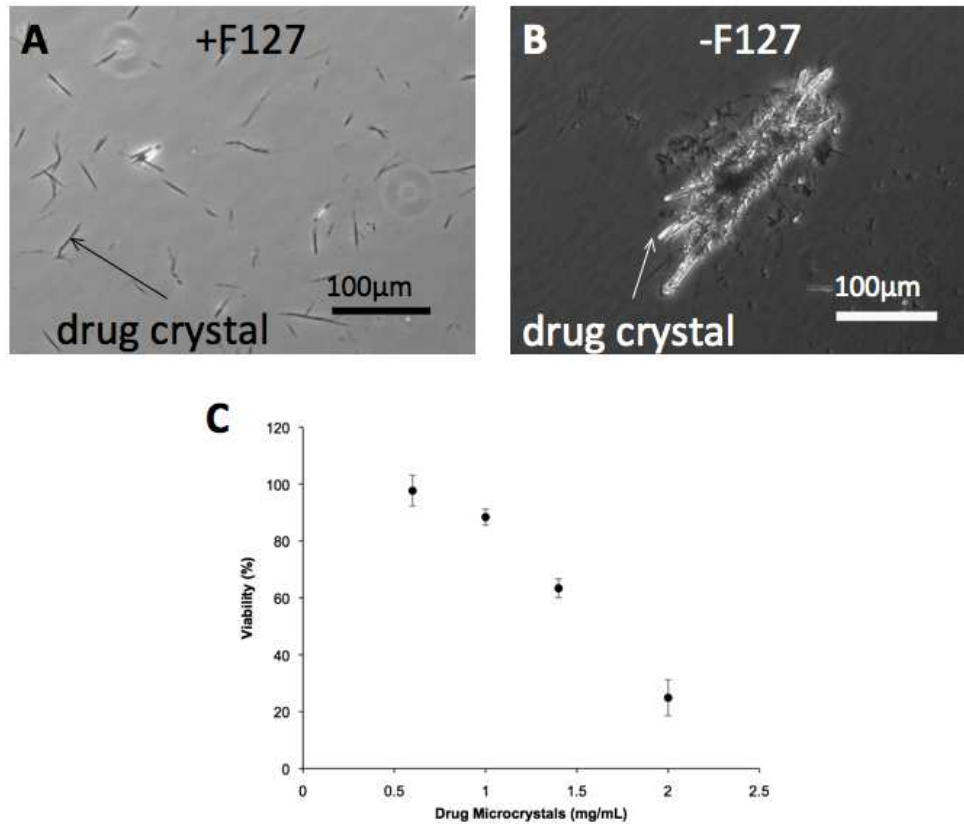

**Supplemental Figure S2. Effects of Pluronic F127 on microcrystal growth and stability.** (A) Microcrystals formed in the presence of Pluronic were micron sized while in the absence of Pluronic (B) the crystals aggregated and were significantly larger. (C) In the absence of a hydrogel barrier, the drug microcrystals become cytotoxic at concentrations above 1 mg/mL. The direct contact between cells and drug crystal leads to high local drug concentrations that are cytotoxic. The hydrogel barrier serves to disperse the drug crystals and slow down the drug release rate both of which contribute to the lack of cytotoxicity.

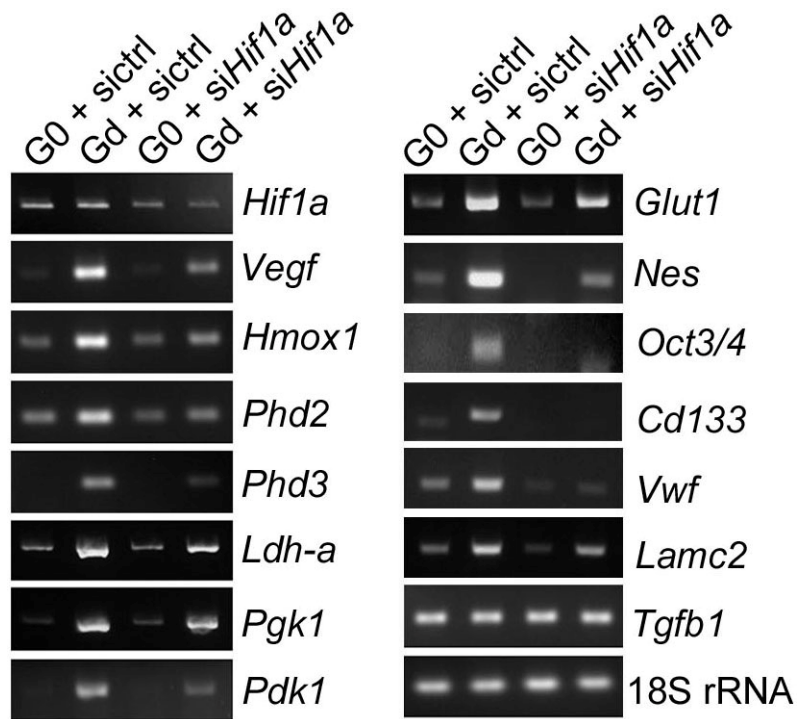

**Supplemental Figure S3. HIF-1 $\alpha$  target genes and dedifferentiation marker genes up-regulated by 1,4-DPCA/gel were blocked by knockdown of *Hif1a*.** B6 ear fibroblast-like cells were treated with either siRNA control or *siHif1a* for 48 hours. The transfected cells were cultured with hydrogel but no drug ( $G_0$ ) and with 2 mg 1,4-DPCA crystal/gel construct ( $G_d$ ) for another 24 hrs. RT-PCR analysis of mRNA from treated B6 cells revealed that multiple genes, including HIF-1 $\alpha$  target genes (*Vegf*, *Hmox1*, *Ldh-a*, *Pgk1*, *Pdk1* and *Glut1*) and de-differentiation marker genes (*Nes*, *Oct3/4*, *Cd133*, *Vwf* and *Lamc2*), were specifically increased by 1,4-DPCA, but blocked by *Hif1a* interference with *siHif1a\_3*.



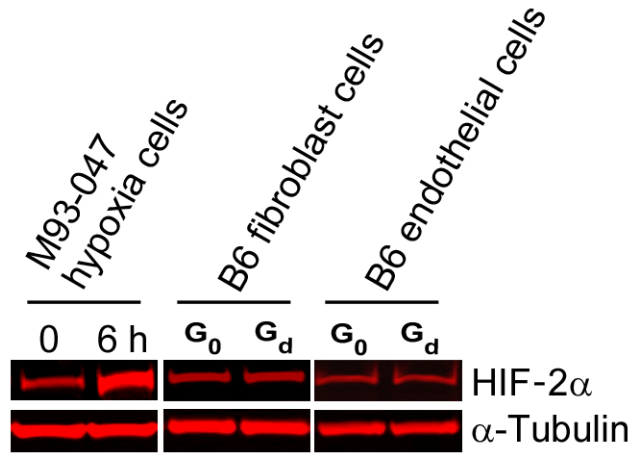

**Supplemental Figure S4: HIF-2 $\alpha$  is not affected by the 1,4-DPCA drug/gel construct in vitro.** HIF-2 $\alpha$  levels were examined in different cell types including a melanoma cell line M93-047 under hypoxic conditions, and B6 fibroblasts and endothelial cells +/- 1,4-DPCA drug/gel under normoxic conditions. Only hypoxic conditions showed increased levels of HIF-2 $\alpha$ , not 1,4-DPCA treatment.

### A. Injection Scheme

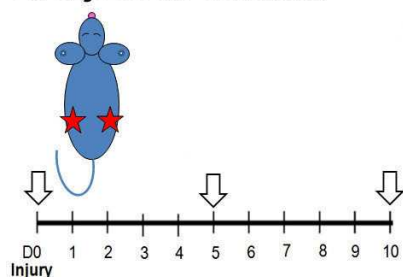

### B. Distal 1,4-DPCA

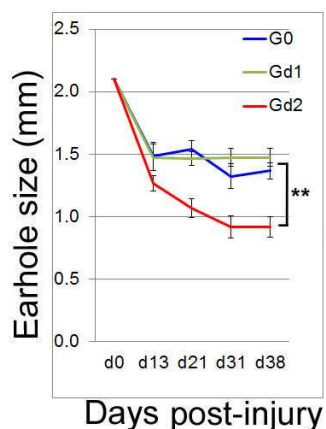

### C. Long term effect of 1,4-DPCA

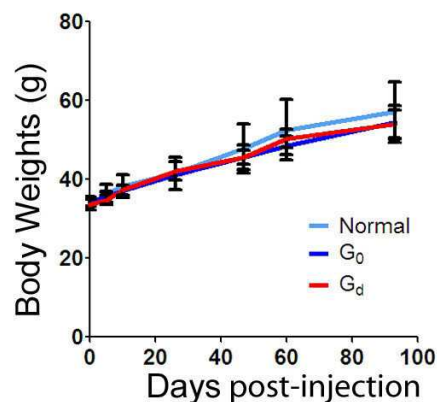

### Supplemental Figure S5. Distal and long-term effects and survival of drug/gel-treated Swiss Webster mice.

Mice were injected subcutaneously on days 0, 5 and 10 into the right and left flanks (A) using G<sub>0</sub> and two different doses of drug/gel (G<sub>d1</sub>, 1 mg/ml drug/gel; G<sub>d2</sub>, 2 mg/ml drug/gel). Ear hole closure was achieved at 2 mg/ml but not 1 mg/ml (B) and results (G<sub>d2</sub> vs G<sub>d1</sub>, and G<sub>d2</sub> vs G<sub>0</sub>) were highly significant (\*\*) on days 21, 31, and 38. Normal mice were ear-punched and used as control with results similar to G<sub>0</sub> and G<sub>d1</sub> and which are presented in Table S8. For long-term effects of the drug/gel, Swiss Webster mice were injected subcutaneously (s.c.) 3 times with G<sub>0</sub> or G<sub>d</sub> at the base of the neck. Body weight was measured for 91 days and skin was superficially examined (C). There was no difference between these 3 groups, indicating that the drug/gel has no obvious side-effects in-vivo. ANOVA analysis for experiments in B and C are presented in Table S8.

## Mast cell staining (day 14)

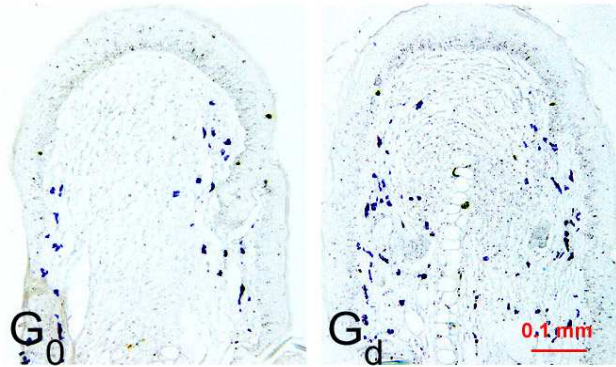

**Supplemental Figure S6. Inflammatory responses are affected by 1,4-DPCA treatment.** Ear tissue from  $G_0$  and  $G_d$ -treated mice stained with toluidene blue to detect mast cells shows a significant increase in mast cell numbers after  $G_d$  treatment. Scale bar=0.1mm. A similar increase in mast cells is seen in MRL mice (17). Also, as seen in Fig 6Cd,e, MPO, a marker of inflammation, and Ly6G, a neutrophil-specific marker, are up-regulated in the non-regenerative Swiss Webster given 1,4-DPCA similar to the untreated MRL mouse (17).

Down-regulation of HIF-1 $\alpha$  inhibits inflammation. It has been shown using a *Hif1a* conditional knockout mouse that HIF-1 $\alpha$  is required and controls the inflammatory response through regulation of glycolysis, a state necessary for myeloid (including neutrophils and macrophages) survival and function with effects specifically on aggregation, invasion, motility, and cutaneous inflammation (80). NSAIDs such as the COX2 inhibitors indomethacin, meloxicam (81) and ibuprofen (82), which negatively regulate inflammation, also inhibit HIF-1 $\alpha$  (81,37) through the up-regulation of pVHL expression (17). Down-regulation of HIF-1 $\alpha$  in a *Hif* KO mouse has been shown to heal burn wounds poorly with a concomitant reduction in angiogenesis and SDF1 (38).

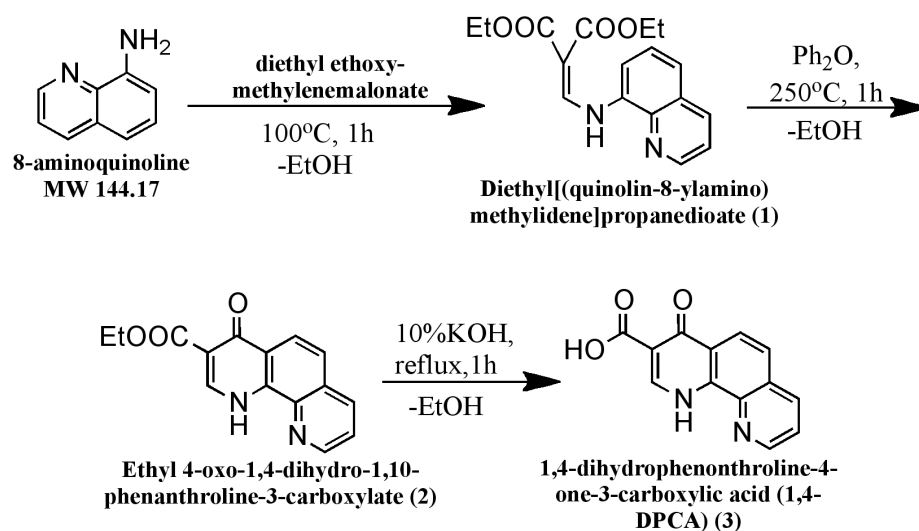

**Supplemental Figure S7. Synthesis of 1,4-DPCA.** Synthesis was accomplished in three steps (see main text for a detailed description). The synthetic scheme and the chemical structures of the three main products (1-3) are shown here.

**Supplemental Table S1. Primer sequences used for RT-PCR.**

| <b>Gene</b>     | <b>Forward 5'--3'</b>       | <b>Reverse 5'--3'</b>     |
|-----------------|-----------------------------|---------------------------|
| <i>Vegfa</i>    | GAGACCTGGTGGACATCTTC        | ATTTACACGTCTGCGGATCTTG    |
| <i>Hmox1</i>    | TCCAGACACCGCTCCTCCAG        | GGATTTGGGGCTGCTGGTTTC     |
| <i>Phd2</i>     | CTCGTGGACAGGATGGACAG        | GCAGCCAAGAGCAGTCACAG      |
| <i>Phd3</i>     | CAATGGTGATGGCCGCTGTA        | TGTGGATTCTGCGGTCTGA       |
| <i>Ldh-a</i>    | CGTCTCCCTGAAGTCTCTTAACC     | CCCACACCATCTCAACACC       |
| <i>Pgk1</i>     | CAAACAACCAAAGGATCAAGG       | CCCAAGATAGCCAGGAAGG       |
| <i>Pdk1</i>     | CGGATCAGAAACCGACACA         | ACTGAACATTCTGGCTGGTGA     |
| <i>Glut1</i>    | AGAGGTGTACCTACAGCTC         | AACAGGATACACTGTAGCAG      |
| <i>Hif1a</i>    | TGCTCATCAGTTGCCACTTC        | TGGGCCATTTCTGTGTGTAA      |
| <i>Tgfb1</i>    | ATACGCCTGAGTGGCTGTCT        | TTCTCTGTGGAGCTGAAGCA      |
| <i>Nes</i>      | CCCTGAAGTCGAGGAGCTG         | CTGCTGCACCTCTAAGCGA       |
| <i>Oct3/4</i>   | CGTGGAGACTTTGCAGCCTG        | GCTTGGCAAACCTGTTCTAGCTCCT |
| <i>Cd133</i>    | CCTTGTGGTTCTTACGTTTGTTG     | CGTTGACGACATTCTCAAGCTG    |
| <i>Vwf</i>      | CTTCTGTACGCCTCAGCTATG       | GCCGTTGTAATTCCCACACAAG    |
| <i>Nanog</i>    | GAACTATTCTTGCTTACAAGGGTCTGC | GCATCTTCTGCTTCTGCTGCAA    |
| <i>Pref1</i>    | CTGGCGGTCAATATCATCTTCC      | GAGGAAGGGGTTCTTAGATAGCG   |
| <i>Cd34</i>     | GTTACCTCTGGGATCCCTTCAGGCTC  | CTCCAGAGGTGACCAATGCAATAAG |
| <i>Nefh</i>     | AGCCTGCACTACTCGCTGA         | GGCCGTTGCTTAGGGTGTCT      |
| <i>Pax7</i>     | CTCCCGTCAGCTCCGTGTTTCTCA    | ATGTCCGGGTAGTGGGTCTCTCG   |
| <i>Loxl4</i>    | AGCGGACAGACCAGAGGAG         | CCTTGACCATACTTGGCACTG     |
| <i>Ctgf</i>     | GCCCTAGCTGCCTACCGACT        | CATAGTTGGGTCTGGGCAA       |
| <i>Mgp</i>      | GGCAACCCTGTGCTACGAAT        | CCTGGACTCTCTTTTGGGCTTTA   |
| <i>Itm2a</i>    | AGGAGAGCCATACTTTCTGCC       | GCCGGATCGCTATCAGAGA       |
| <i>Matn3</i>    | TCTCCCGCATCATCGACT          | GTCGGAATAGGTGTTGAGCTG     |
| <i>Mia2</i>     | GTGTCTGGAGGGTACAAAGTTG      | TCGGGTCTGTGTAATCTCTC      |
| <i>Col11a1</i>  | GACACACTGAAAGCATCCAG        | GGCAGCAGTGATTCTTAAC       |
| <i>Prg4</i>     | GAAAATACTTCCCGTCTGCTTGT     | ACTCCATGTAGTGTGCTGACAGTTA |
| <i>Fmod</i>     | CTCCAACCCAAGGAGACCAG        | GGATCCACCAGTGAGAGTCTTC    |
| <i>S100a4</i>   | CGGCCAGAAAAGGACAGATG        | TTGTCCCTGTTGCTGTCAA       |
| <i>Wif1</i>     | CCACCTGAGGAGAGCTTGTACC      | TGGCATTCTTTGTTGGGCTTTCC   |
| <i>Dkk3</i>     | TCAGGAGGAAGCTACGCTCAATG     | TCTCCGTGCTGGTCTCATTGTG    |
| <i>Dcn</i>      | CACCCGACACAACCTTGCTAG       | GCCTTTCCAACCTCACGAGAGG    |
| <i>Tgfb2</i>    | TGGTTCCTCTGTATTGCTCTCTGC    | TCCCCCTGGCTTATTTGAGTTC    |
| <i>Lamc2</i>    | AGGCGCGGCAAGATATAGAG        | GTCTGCGCAAGATGAATGAGAG    |
| <i>Gapdh</i>    | CGCAACGACCCCTTCATTGACC      | CGATGAGCCCTTCCACAATGCC    |
| <i>18S rRNA</i> | CGGCGACGACCCATTGAAAC        | GAATCGAACCCCTGATTCCCCGTC  |

**Supplemental Table S2. Antibodies used for Immunostaining.**

|                     | 1st antibody      |          |          | 2nd antibody                          |                            |           |          |
|---------------------|-------------------|----------|----------|---------------------------------------|----------------------------|-----------|----------|
|                     | Company           | Cat. no. | Dilution | All From Molecular Probe              | Company                    | Cat. no.  | Dilution |
| HIF-1 $\alpha$      | Abcam             | ab2185   | 1:1000   | Alexa Fluor 488 goat anti-rabbit IgG  | Molecular Probe            | A11008    | 1:200    |
| Nanog               | Calbiochem        | SC1000   | 1:150    | Alexa Fluor 568 goat anti-rabbit IgG  | Molecular Probe            | A11036    | 1:400    |
| Oct-3/4             | Santa Cruz        | sc-5279  | 1:150    | Alexa Fluor 568 rabbit anti-mouse IgG | Molecular Probe            | A11061    | 1:400    |
| CD133               | Chemicon          | MAB4310  | 1:100    | Alexa Fluor 594 goat anti-rat IgG     | Molecular Probe            | A11007    | 1:200    |
| CD34                | Bioss             | bs-0646R | 1:200    | Alexa Fluor 568 goat anti-rabbit IgG  | Molecular Probe            | A11036    | 1:300    |
| Wnt5a               | R&D Systems       | BAF645   | 1:150    | Alexa Fluor 568 donkey anti-goat IgG  | Molecular Probe            | A11057    | 1:200    |
| PAX7                | R&D Systems       | MAB1675  | 1:50     | Alexa Fluor 568 rabbit anti-mouse IgG | Molecular Probe            | A11061    | 1:400    |
| Pref-1              | MBL International | D187-3   | 1:10     | Alexa Fluor 594 goat anti-rat IgG     | Molecular Probe            | A11007    | 1:200    |
| Nestin              | DHSB              |          | 1:50     | Alexa Fluor 594 goat anti-mouse IgG   | Molecular Probe            | A11005    | 1:200    |
| vWF                 | Dako              | A0082    | 1:100    | Alexa Fluor 488 goat anti-rabbit IgG  | Molecular Probe            | A11008    | 1:200    |
| Nefh                | Sigma             | N0142    | 1:200    | Alexa Fluor 568 rabbit anti-mouse IgG | Molecular Probe            | A11061    | 1:400    |
| Lamc2               | Sigma             | L-9393   | 1:50     | Alexa Fluor 568 goat anti-rabbit IgG  | Molecular Probe            | A11036    | 1:1000   |
| MPO                 | NeoMarkers        | RB-373A1 | 1:70     | Alexa Fluor 488 goat anti-rabbit IgG  | Molecular Probe            | A11008    | 1:200    |
| Anti-Neutrophil mAb | Cedarlane         | CL8993F  | 1:40     | FITC mouse anti-rat IgG               | Jackson ImmunoResearch lab | 212096082 | 1:100    |
| Keratin14           | Sigma             | C8791    | 1:200    | Alexa Fluor 488 goat anti-mouse IgG   | Molecular Probe            | A10680    | 1:100    |
| MMP9                | Sigma             | M9555    | 1:200    | Alexa Fluor 568 goat anti-rabbit IgG  | Molecular Probe            | A11036    | 1:200    |

**Figure 1D. HIF-1 $\alpha$  Immunohistochemistry Quantitation**

| Group/day   | day0    | day3    | day7    | day10   | day14   | day15   |
|-------------|---------|---------|---------|---------|---------|---------|
| MRL-derived | 0.9     | 47.91   | 261.6   | 186.1   | 16      | 6.2     |
|             | 17.6    | 40.06   | 619.8   | 191.7   | 60.1    | 9.5     |
|             | 4.2     | 56.67   | 422.2   | 148.1   | 22.4    | 6.9     |
|             | 2.6     | 31.06   | 344.4   | 425.3   | 108.6   | 14.7    |
|             |         |         |         | 345.5   |         | 6.1     |
|             |         |         |         |         |         | 41      |
|             |         |         |         |         |         | 67.9    |
| mean        | 6.325   | 43.925  | 412.000 | 259.340 | 51.775  | 21.757  |
| st dev      | 7.636   | 10.936  | 153.270 | 119.666 | 42.588  | 23.831  |
| st error    | 4.409   | 6.314   | 88.490  | 59.833  | 24.588  | 9.729   |
|             |         |         |         |         |         |         |
| Group/day   | day0    | day3    | day7    | day10   | day14   | day15   |
| B6-derived  | 3.3     | 15      | 111.7   | 2.9     | 0.35    | 2.6     |
|             | 3.3     | 14.45   | 202.3   | 7.6     | 1.48    | 2.7     |
|             | 3.7     | 7.23    | 172.4   | 4.8     | 1.25    | 1.2     |
|             |         | 6.59    | 185.4   | 3.4     | 1.15    | 4.3     |
|             |         |         |         |         |         | 2.5     |
|             |         |         |         |         |         | 5.5     |
| mean        | 3.433   | 10.818  | 167.950 | 4.675   | 1.058   | 3.133   |
| st dev      | 0.231   | 4.525   | 39.447  | 2.109   | 0.491   | 1.521   |
| st error    | 0.163   | 2.613   | 22.775  | 1.218   | 0.284   | 0.680   |
| p value*    | 0.55042 | 0.00139 | 0.02155 | 0.00405 | 0.05465 | 0.08413 |

\* Based on T test to compare means between group measurements at the same day

**Figure 1Ha. *SiHif1a* in MRL backcross Mice**

| Group/day      | da7        | da14       | da21       | da28       |       |
|----------------|------------|------------|------------|------------|-------|
| <i>SiHif1a</i> | 2.5        | 1.8        | 1.4        | 1.4        |       |
|                | 2.1        | 1.9        | 1.6        | 1.3        |       |
|                | 2.2        | 2          | 2.4        | 1.7        |       |
|                | 2.3        | 3.2        | 1.9        | 2.3        |       |
|                | 2.8        | 3          | 1.5        | 1.1        |       |
|                | 2.6        | 2          | 2.6        | 1          |       |
|                | 2.3        | 1.9        | 1.4        | 1.7        |       |
|                | <u>2.1</u> | <u>2</u>   | <u>1.5</u> | <u>2.5</u> |       |
|                | mean       | 2.363      | 2.225      | 1.788      | 1.625 |
|                | st dev     | 0.250      | 0.547      | 0.470      | 0.542 |
| st error       | 0.095      | 0.207      | 0.178      | 0.205      |       |
|                |            |            |            |            |       |
| Group/day      | da7        | da14       | da21       | da28       |       |
| PBS            | 2          | 1.4        | 1          | 0.9        |       |
|                | 2.1        | 1.2        | 0.8        | 0.8        |       |
|                | 2          | 1.2        | 0.7        | 0.3        |       |
|                | 2          | 1.3        | 0.7        | 0.4        |       |
|                | 2.1        | 1.4        | 0.9        | 0.4        |       |
|                | 2          | 1.5        | 0.7        | 0.6        |       |
|                | 2.1        | 1.3        | 1          | 0.7        |       |
|                | <u>2</u>   | <u>1.5</u> | <u>0.9</u> | <u>0.5</u> |       |
|                | mean       | 2.038      | 1.350      | 0.838      | 0.575 |
|                | st dev     | 0.052      | 0.120      | 0.130      | 0.212 |
| st error       | 0.020      | 0.045      | 0.049      | 0.080      |       |
| p value*       | 0.00292    | 0.00058    | 0.00008    | 0.00016    |       |

**Figure 1Hc. HIF-1 $\alpha$  Bioluminescence with PBS or *SiHif* treatment**

| Treatment      | Whole body | Ears      |
|----------------|------------|-----------|
| PBS            | 3.99E+07   | 1.51E+07  |
|                | 3.68E+07   | 1.28E+07  |
|                |            | 1.11E+07  |
|                |            | 1.10E+07  |
|                | mean       | 3.84E+07  |
| st dev         |            | 1.912E+06 |
| st error       |            | 1.104E+06 |
|                |            |           |
| Treatment      | Whole body | Ears      |
| <i>siHif1a</i> | 2.13E+07   | 6.37E+06  |
|                | 2.66E+07   | 1.06E+07  |
|                |            | 6.68E+06  |
|                |            | 1.02E+07  |
|                | mean       | 2.40E+07  |
| st dev         |            | 2.253E+06 |
| st error       |            | 1.301E+06 |
| p value*       |            | 0.03400   |

**Supplemental Table S3: Raw data and statistical significance testing for Fig. 1.**

In Figure 1D, MRL and B6 ear tissue stained with anti-HIF-1 $\alpha$  + fluorescent 2<sup>o</sup> antibodies was analyzed by converting the images to gray scale and measuring the raw integrated density (sum of all intensities from areas of tissue measured) divided by the area of tissue ( $\mu\text{m}^2$ ) using ImageJ software and finally expressed as fluorescence Integrated density/ $\mu\text{m}^2$  (# ears, n=3-7). In Figure 1Ha, ear holes were read on days 7, 14, 21, and 28 from mice treated with PBS or *siHif1a*. Ear holes (n=4 for each group) with read with a reticle and each hole was read twice, first at a longitudinal axis and then a perpendicular axis for any irregular-shaped healing. In Figure 1Hc, HIF-luc mice were injected with luciferin on day 28 after ear hole injury and bioluminescence in the ear (n=4) and whole body (n=2) for each group determined using the IVIS 200. Data is expressed as Intensity (p/sec/cm<sup>2</sup>/sr) as determined by Living Image (IVIS bounded software) direct data analysis.

**Figure 3G. HIF-1 $\alpha$  Immunohistochemistry Quantitation**

| Group/day  | day1     | day2     | day3     | day4     | day5    |
|------------|----------|----------|----------|----------|---------|
| Go-treated | 13.1868  | 9.7902   | 54.612   | 22.311   | 21.5    |
|            | 2.5308   | 26.0406  | 22.4442  | 101.6316 | 8.658   |
| mean       | 7.8588   | 17.9154  | 38.5281  | 61.9713  | 15.079  |
|            |          |          |          |          |         |
| Group/day  | day1     | day2     | day3     | day4     | day5    |
| Gd-treated | 152.2476 | 232.9002 | 291.5748 | 303.363  | 80.784  |
|            | 210.3228 | 188.6112 | 208.1916 | 323.0766 | 44.955  |
| mean       | 181.2852 | 210.7557 | 249.8832 | 313.2198 | 62.8695 |

**Supplemental Table S4: Raw data and statistical significance testing for Fig. 3G.**

Ear tissue from G<sub>o</sub> and G<sub>d</sub>-treated Swiss Webster mice days 1-5 post-injury (n=2 for each group) was treated as described for Fig 1D.



Figure 4B: G0 and Gd-Treated Swiss Webster Mice

| Group/day   | G0-da14 | G0-da21 | G0-da28 | G0-da35 |
|-------------|---------|---------|---------|---------|
| G0-Treated: | 1.7     | 1.8     | 1.8     | 1.7     |
|             | 1.6     | 1.8     | 1.7     | 1.6     |
|             | 1.6     | 1.4     | 1.4     | 1.5     |
|             | 1.7     | 1.3     | 1.5     | 1.6     |
|             | 1.8     | 1.5     | 1.4     | 1.5     |
|             | 1.9     | 1.6     | 1.4     | 1.5     |
|             | 1.6     | 1.5     | 1       | 1.2     |
|             | 1.4     | 1.4     | 0.9     | 1       |
|             | 1.8     | 1.5     | 1.3     | 1.4     |
|             | 2       | 1.4     | 1.4     | 1.4     |
|             | 2.1     | 1.3     | 1.2     | 0.9     |
|             | 1.8     | 1.5     | 1.3     | 0.9     |
|             | 1.5     | 1.7     | 1.8     | 1.9     |
|             | 1.7     | 1.8     | 1.9     | 1.8     |
|             | 1.4     | 1.9     | 1.2     | 1.3     |
|             | 1.8     | 1.8     | 1.3     | 1.2     |
|             | 1.6     | 1.4     | 1.6     | 1.7     |
|             | 1.4     | 1.3     | 1.8     | 1.7     |
|             | 1.4     | 1.5     | 1.9     | 1.7     |
|             | 1.5     | 1.5     | 1.6     | 1.6     |
| mean        | 1.665   | 1.545   | 1.470   | 1.455   |
| st dev      | 0.203   | 0.190   | 0.289   | 0.291   |
| st error    | 0.047   | 0.044   | 0.066   | 0.067   |

  

| Group/day   | Gd-da14  | Gd-da21  | Gd-da28  | Gd-da35  |
|-------------|----------|----------|----------|----------|
| Gd-Treated: | 1        | 0.8      | 0.7      | 0.4      |
|             | 1.3      | 0.9      | 0.8      | 0.3      |
|             | 0.7      | 1        | 0.2      | 0.2      |
|             | 0.8      | 0.8      | 0.1      | 0.1      |
|             | 1.3      | 1.3      | 1.3      | 1.3      |
|             | 1.4      | 1.4      | 1.2      | 1.2      |
|             | 0.9      | 1.2      | 1.5      | 1.3      |
|             | 1.2      | 1.5      | 1.1      | 0.95     |
|             | 1.5      | 1        | 1.3      | 1.3      |
|             | 1.1      | 0.8      | 1.2      | 1.2      |
|             | 0.8      | 0.4      | 0        | 0        |
|             | 0.9      | 0.5      | 0        | 0        |
|             | 1.3      | 0.2      | 0.7      | 0.6      |
|             | 1        | 0.5      | 0.6      | 0.6      |
|             | 1.4      | 1.5      | 0.5      | 0        |
|             | 1.3      | 1.3      | 0.5      | 0        |
|             | 1.5      | 1        | 0.9      | 0.6      |
|             | 1.5      | 0.9      | 0.8      | 0.5      |
|             | 1.5      | 0.5      | 0        | 0        |
|             | 1.8      | 0.3      | 0        | 0        |
| mean        | 1.210    | 0.890    | 0.670    | 0.528    |
| st dev      | 0.297    | 0.399    | 0.499    | 0.509    |
| st error    | 0.068    | 0.091    | 0.114    | 0.117    |
| p value     | 1.71E-06 | 7.79E-08 | 2.92E-07 | 1.93E-08 |

Figure 4E: G0, Gd, and Gd/siHif1 a-treated Swiss Webster Mice

| Group/day       | day14         |            |          | day21    |            |       |
|-----------------|---------------|------------|----------|----------|------------|-------|
|                 | Gd            | Gd/siHif1a | G0       | Gd       | Gd/siHif1a | G0    |
|                 | 1.1           | 1.8        | 1.3      | 1        | 2          | 1.2   |
|                 | 0.9           | 1.7        | 1.7      | 1        | 1.7        | 1.7   |
|                 | 1.1           | 2          | 1.7      | 1.3      | 1.2        | 1.7   |
|                 | 1             | 1.9        | 1.5      | 1.2      | 1.5        | 1.5   |
|                 | 1.2           | 1.4        | 1.1      | 1        | 1.8        | 1.1   |
|                 | 1.3           | 1.5        | 1        | 1        | 1.6        | 0.8   |
|                 | 1.5           | 1.7        | 1.8      | 1        | 1.5        | 1.5   |
|                 | 1.1           | 1.7        | 1.5      | 1.1      | 1.4        | 1.3   |
|                 | 1.2           | 1.7        | 1.3      | 0.6      |            | 1.2   |
|                 | 1.3           | 1.5        | 1.5      | 0.7      |            | 1     |
|                 | 1.3           |            |          | 1        |            |       |
|                 | 0.9           |            |          | 0.9      |            |       |
|                 | 1.4           |            |          |          |            |       |
|                 | 1.4           |            |          |          |            |       |
| mean            | 1.193         | 1.690      | 1.440    | 0.983    | 1.588      | 1.300 |
| st dev          | 0.186         | 0.185      | 0.263    | 0.190    | 0.247      | 0.298 |
| st error        | 0.052         | 0.062      | 0.088    | 0.057    | 0.094      | 0.099 |
| Anova p value*  | 1.46E-05      |            |          | 4.44E-05 |            |       |
| Tukey p value** | Gd vs G0      |            | 0.02163  |          | 0.01484    |       |
|                 | siHif1a vs G0 |            | 0.03292  |          | 0.051      |       |
|                 | siHif1a vs Gd |            | 8.80E-06 |          | 3.07E-05   |       |

\* Anova test to compare the mean among the three groups at the corresponding days

\*\* Post-hoc Tukey test to compare between group mean if Anova test is significant

**Supplemental Table S5: Raw data and statistical significance testing for Fig. 4.**

In Figure 4B, Swiss Webster mice were treated with G<sub>0</sub> (gel, no drug) or G<sub>d</sub> (gel +2mg/ml drug) and ear hole diameters read on days 14, 21, 28, and 35. Ear holes were read twice, first at a longitudinal axis and then a perpendicular axis for any irregular-shaped healing. In Figure 4E, Swiss Webster mice were treated with G<sub>0</sub>, G<sub>d</sub>, or G<sub>d</sub> + siHif1a and ear hole diameter were read on days 14 and 21. The ANOVA test was performed to indicate if there were a significant difference among the means of the three groups. If the p-value from ANOVA is significant, then the post-hoc Tukey test is applied to compare the mean between each group. P-values less than 0.05 are considered as significant. The day 14 p-value from ANOVA is highly significant (much less than 0.001), which means there is significant difference among the means of the three groups. All p-values from Tukey host-hoc test are significant: the difference of means between group G<sub>d</sub> and G<sub>0</sub> is significant (p=0.0216), between group SiHif1a and G<sub>0</sub> is significant (0.0329), and between group SiHif1a and G<sub>d</sub> is highly significant (much less than 0.001). The day 21 p-value from ANOVA is highly significant (much less than 0.001), which means there is significant difference among the means of the three groups. Tukey host-hoc test: the difference of means between group G<sub>d</sub> and G<sub>0</sub> is significant (p=0.0148), between group SiHif1a and G<sub>0</sub> is not significant (p=0.051), and between group SiHif1a and G<sub>d</sub> is highly significant (much less than 0.001).

**Figure 5B. Relative gene expression**

| Group/Gene    | G0   |      |   | Gd    |      |   | Gd vs G0 |
|---------------|------|------|---|-------|------|---|----------|
|               | mean | SEM  | N | mean  | SEM  | N | p value  |
| <i>Nanog</i>  | 1    | 0.02 | 3 | 13.00 | 1.12 | 3 | 0.0004   |
| <i>Oct3/4</i> | 1    | 0.15 | 3 | 5.94  | 0.96 | 3 | 0.0071   |
| <i>CD133</i>  | 1    | 0.24 | 3 | 5.65  | 1.01 | 3 | 0.011    |
| <i>Pref-1</i> | 1    | 0.22 | 3 | 9.50  | 1.89 | 3 | 0.0016   |
| <i>Nestin</i> | 1    | 0.12 | 3 | 14.63 | 1.66 | 3 | 0.0012   |
| <i>Pax7</i>   | 1    | 0.21 | 3 | 14.03 | 1.21 | 3 | 0.0004   |
| <i>Vwf</i>    | 1    | 0.16 | 3 | 18.39 | 3.78 | 3 | 0.0101   |
| <i>CD34</i>   | 1    | 0.07 | 3 | 15.27 | 1.72 | 3 | 0.0012   |

**Supplemental Table S6: Raw data and statistical significance testing for Fig. 5.**

In **Fig. 5B**, relative gene expression is provided. QPCR was carried out using pooled tissue from three ear donuts/sample and each experiment repeated three times. P values are shown comparing amplification in tissue from G<sub>0</sub>-treated and G<sub>d</sub>-treated Swiss Webster mice.

**Figure 6Bg. Relative gene expression**

| Group/Gene    | G0   |      |   | Gd    |      |   | Gd vs G0 |
|---------------|------|------|---|-------|------|---|----------|
|               | mean | SEM  | N | mean  | SEM  | N | p value  |
| <i>Nestin</i> | 1    | 0.13 | 3 | 16.11 | 4.17 | 3 | 0.0223   |
| <i>Oct3/4</i> | 1    | 0.3  | 3 | 12.96 | 1.49 | 3 | 0.0014   |
| <i>Nfj</i>    | 1    | 0.16 | 3 | 12.55 | 1.95 | 3 | 0.0041   |
| <i>Pax7</i>   | 1    | 0.3  | 3 | 5.35  | 0.55 | 3 | 0.0023   |

**Figure 6Dd. Collagen Crosslinking**

| Group       | G0         | Gd        | Gd+SiHif1 a |
|-------------|------------|-----------|-------------|
|             | 171        | 87        | 181         |
|             | 156        | 93        | 153         |
| <b>mean</b> | <b>163</b> | <b>90</b> | <b>167</b>  |

**Figure 6De. Relative gene expression**

| Group/Gene          | G0   |      |   | Gd   |      |   | Gd vs G0 |
|---------------------|------|------|---|------|------|---|----------|
|                     | mean | SEM  | N | mean | SEM  | N | p value  |
| <i>Loxl4</i> (day2) | 1    | 0.14 | 3 | 0.02 | 0.01 | 3 | 0.0022   |
| <i>Loxl4</i> (day3) | 1    | 0.2  | 3 | 0.03 | 0.01 | 3 | 0.0084   |
| <i>Ctgf</i> (day2)  | 1    | 0.1  | 3 | 0.36 | 0.10 | 3 | 0.0024   |
| <i>Ctgf</i> (day3)  | 1    | 0.2  | 3 | 0.04 | 0.01 | 3 | 0.0087   |

**Figure 6Eb. Soft tissue diameter (day 35)**

| Group           | G0            | Gd            |
|-----------------|---------------|---------------|
|                 | 1.7           | 0.4           |
|                 | 1.6           | 0.3           |
|                 | 1.5           | 0.2           |
|                 | 1.6           | 0.1           |
|                 | 1.5           | 1.3           |
|                 | 1.5           | 1.2           |
|                 | 1.2           | 1.3           |
|                 | 1             | 0.95          |
|                 | 1.4           | 1.3           |
|                 | 1.4           | 1.2           |
|                 | 0.9           | 0             |
|                 | 0.9           | 0             |
|                 | 1.9           | 0.6           |
|                 | 1.8           | 0.6           |
|                 | 1.3           | 0             |
|                 | 1.2           | 0             |
|                 | 1.7           | 0.6           |
|                 | 1.7           | 0.5           |
|                 | 1.7           | 0             |
|                 | 1.6           | 0             |
| <b>mean</b>     | <b>1.455</b>  | <b>0.5275</b> |
| <b>st dev</b>   | <b>0.2911</b> | <b>0.5087</b> |
| <b>st error</b> | <b>0.0668</b> | <b>0.1167</b> |
| <b>p value</b>  | 1.9E-08       |               |

**Figure 6Ed. Relative gene expression**

| Group/Gene     | G0   |      |   | Gd    |      |   | Gd vs G0 |
|----------------|------|------|---|-------|------|---|----------|
|                | mean | SEM  | N | mean  | SEM  | N | p value  |
| <i>Mgp</i>     | 1    | 0.13 | 3 | 2.57  | 0.41 | 3 | 0.0218   |
| <i>Itih2a</i>  | 1    | 0.09 | 3 | 19.21 | 1.04 | 3 | 0.00003  |
| <i>matn3</i>   | 1    | 0.25 | 3 | 7.71  | 0.39 | 3 | 0.0001   |
| <i>Mia2</i>    | 1    | 0.15 | 3 | 14.02 | 1.78 | 3 | 0.0019   |
| <i>Col11a1</i> | 1    | 0.27 | 3 | 8.76  | 2.7  | 3 | 0.0459   |
| <i>Prg4</i>    | 1    | 0.02 | 3 | 3     | 0.1  | 3 | 0.00007  |
| <i>Fmod</i>    | 1    | 0.02 | 3 | 2.06  | 0.31 | 3 | 0.027    |
| <i>Chad</i>    | 1    | 0.27 | 3 | 40.45 | 1.44 | 3 | 0.00001  |

**6Ee. Cartilage diameter (day 35)**

| Group           | G0*            | Gd           |
|-----------------|----------------|--------------|
|                 | 2.32           | 1.76         |
|                 | 2.4            | 1.68         |
|                 | 2.16           |              |
| <b>mean</b>     | <b>2.293</b>   | <b>1.720</b> |
| <b>st dev</b>   | <b>0.122</b>   |              |
| <b>st error</b> | <b>0.08641</b> |              |

**Figure 6Ef. Cartilage area (day 35)**

| Group           | G0           | Gd           |
|-----------------|--------------|--------------|
|                 | 0.493        | 2.98         |
|                 | 0            | 1.705        |
|                 | 0            | 4.615        |
|                 | 0            | 0.822        |
|                 | 0            |              |
|                 | 0            |              |
| <b>mean</b>     | <b>0.082</b> | <b>2.531</b> |
| <b>st dev</b>   | <b>0.201</b> | <b>1.648</b> |
| <b>st error</b> | <b>0.090</b> | <b>0.951</b> |
| <b>p value</b>  |              | 0.005934     |

**Figure 6Ei. Relative gene expression**

| Group/Gene    | G0   |      |   | Gd   |      |   | Gd vs G0 |
|---------------|------|------|---|------|------|---|----------|
|               | mean | SEM  | N | mean | SEM  | N | p value  |
| <i>S100a4</i> | 1    | 0.06 | 3 | 2.77 | 0.14 | 3 | 0.0003   |
| <i>Wif1</i>   | 1    | 0.15 | 3 | 4.20 | 0.25 | 3 | 0.0004   |
| <i>Dkk3</i>   | 1    | 0.1  | 3 | 3.96 | 0.38 | 3 | 0.0017   |
| <i>DCN</i>    | 1    | 0.1  | 3 | 2.08 | 0.10 | 3 | 0.0016   |
| <i>Tgfb2</i>  | 1    | 0.2  | 3 | 6.97 | 0.50 | 3 | 0.0004   |

**6Ej. Number of hair follicles (day 35)**

| Group                | G0*              | Gd           | Normal       |
|----------------------|------------------|--------------|--------------|
|                      | 2                | 7            | 4            |
|                      | 1                | 4            | 4            |
|                      | 0                | 4            | 4            |
|                      | 0                | 3            | 5            |
|                      | 0                | 3            | 5            |
|                      | 0                | 4            | 4            |
|                      | 0                | 2            | 4            |
|                      | 0                |              | 4            |
| <b>mean</b>          | <b>0.375</b>     | <b>3.857</b> | <b>4.250</b> |
| <b>st dev</b>        | <b>0.744</b>     | <b>1.574</b> | <b>0.463</b> |
| <b>st error</b>      | <b>0.281</b>     | <b>0.642</b> | <b>0.175</b> |
| <b>Anova p value</b> | 2.67E-07         |              |              |
| <b>Tukey p value</b> | <b>G0 vs Gd</b>  | 4.80E-06     |              |
|                      | <b>G0 vs Nor</b> | 6.00E-07     |              |
|                      | <b>Gd vs Nor</b> | 0.7343       |              |

\* Anova test to compare the mean among the three groups at the corresponding days

\*\* Post-hoc Tukey test to compare between group mean if Anova test is significant

**Supplemental Table S7: Raw data and statistical significance testing for Fig. 6.**

In Fig.6Dd, data was determined from analysis of ear sections stained with picosirius red (PSR) from treated mice and examined under polarized light. Level of tissue brightness after PSR staining is directly proportional to degree of

collagen crosslinking. Using ImageJ software, brightness of tissue after gray scale conversion was measured by calculating the raw integrated density related to area of analysed tissue and expressed as Fluorescence Integrated Density per  $\mu\text{m}^2$ . **Fig.6Eb** is derived from **Fig.4B**, day 35 and ear hole diameter was determined using mm diameter reads of ear holes using a reticle (n=10 ear sections, 2 reads each). **In Fig.6Ee**, Alcian blue-stained ear sections were examined at 4X so the whole ear punched region could be visualized. The distance between the ends of the cartilage was determined in mm and linear cartilage elongation was assessed by measuring the distance between Alcian blue-positive ends of the cartilage. The smaller the number, the more cartilage had developed. **In Fig.6Ef**, day 35 ear sections were stained with Alcian blue to detect cartilage. The area of newly developed cartilage was measured by determining the area of Alcian blue-positive tissue inwardly from the site of initial puncture. Measurement was done by ImageJ software to determine blue density. **In 6Ej**, day 35 ear sections were immunostained with anti-keratin antibody. The number of hair follicles was then counted in 2 non-consecutive sections per ear (n=4) in a 1 mm section from the center of hole punch, the area that was originally removed. **In Fig.6Bg, 6De, 6Ed, and 6 Ei**, relative gene expression is shown. QPCR was carried out using pooled tissue from 3 ear donuts and each experiment was repeated 3 times. P values from T-test analysis are provided.

Figure S5B. Distal 1,4-DPCA Injection

| Group/day | Normal |       |       |       | G0-treated |       |       |       | Gd1-treated |       |       |       | Gd2-treated |       |       |       |
|-----------|--------|-------|-------|-------|------------|-------|-------|-------|-------------|-------|-------|-------|-------------|-------|-------|-------|
|           | da13   | da21  | da31  | da38  | da13       | da21  | da31  | da38  | da13        | da21  | da31  | da38  | da13        | da21  | da31  | da38  |
|           | 1.7    | 1.6   | 1.8   | 1.7   | 1.2        | 1.35  | 1.1   | 0.9   | 1.2         | 1.65  | 1.1   | 1.5   | 1.1         | 0.85  | 1     | 1.2   |
|           |        |       | 1.4   | 1.5   |            |       | 0.7   | 1.1   |             |       | 1.6   | 1.8   |             |       | 1.2   | 1.1   |
|           | 1.2    | 1.4   | 1.1   | 1.2   | 1.5        | 1.4   | 1.1   | 1.4   | 1.3         | 1.4   | 1.2   | 1.8   | 1.2         | 1.25  | 0.7   | 0.7   |
|           |        |       | 1.4   | 1.3   |            |       | 0.9   | 1.1   |             |       | 1.7   | 1.5   |             |       | 0.7   | 0.8   |
|           |        |       |       |       | 1.7        | 1.7   | 1.5   | 1.5   | 1.2         | 1.45  | 1.9   | 1.5   | 1.2         | 1.3   | 1.3   | 1.3   |
|           |        |       |       |       |            |       | 1.4   | 1.3   |             |       | 1.4   | 1.5   |             |       | 1.3   | 1.4   |
|           |        |       |       |       | 1.9        | 1.8   | 1.6   | 1.6   | 1.7         | 1.35  | 1.2   | 1.5   | 1.2         | 1.3   | 1     | 1.2   |
|           |        |       |       |       |            |       | 1.2   | 1.5   |             |       | 1.8   | 1.5   |             |       | 1.3   | 1     |
|           |        |       |       |       | 1.3        | 1.5   | 1.8   | 1.5   | 1.3         | 1.5   | 1.6   | 1.6   | 1.4         | 0.7   | 0.7   | 0.6   |
|           |        |       |       |       |            |       | 1.4   | 1.5   |             |       | 1.3   | 1.6   |             |       | 0.8   | 0.6   |
|           |        |       |       |       | 1.3        | 1.5   | 1.8   | 1.7   | 1.7         | 1.45  | 1.5   | 1.5   | 1.5         | 0.7   | 0.5   | 0.8   |
|           |        |       |       |       |            |       | 1.4   | 1.5   |             |       | 1.4   | 1.5   |             |       | 0.5   | 0.8   |
| mean      | 1.450  | 1.500 | 1.425 | 1.425 | 1.483      | 1.542 | 1.325 | 1.383 | 1.400       | 1.467 | 1.475 | 1.567 | 1.267       | 1.017 | 0.917 | 0.958 |
| st dev    | 0.354  | 0.141 | 0.287 | 0.222 | 0.271      | 0.174 | 0.339 | 0.237 | 0.237       | 0.103 | 0.253 | 0.115 | 0.151       | 0.298 | 0.307 | 0.278 |
| st error  | 0.354  | 0.141 | 0.166 | 0.128 | 0.121      | 0.078 | 0.102 | 0.071 | 0.106       | 0.046 | 0.076 | 0.035 | 0.067       | 0.133 | 0.093 | 0.084 |

| Group/day       | da13  | da21   | da31    | da38    |
|-----------------|-------|--------|---------|---------|
| Anova p value*  | 0.458 | 0.0017 | 3.7E-04 | 7.4E-07 |
| Tukey p value** |       |        |         |         |
| G0 vs Gd1       |       | 0.9190 | 0.6166  | 0.1957  |
| G0 vs Gd2       |       | 0.0021 | 0.0104  | 0.0002  |
| Gd1 vs Gd2      |       | 0.0075 | 0.0003  | 4.0E-07 |

\* Anova test to compare the mean among the three groups at the corresponding days

\*\* Post-hoc Tukey test to compare between group mean if Anova test is significant

Figure S5C. Long term Effects of 1,4-DPCA

| Normal                        |        |        |        |        |        |        |        |
|-------------------------------|--------|--------|--------|--------|--------|--------|--------|
|                               | Da0    | Da5    | Da10   | Da26   | Da47   | Da60   | Da93   |
|                               | 35     | 39     | 42     | 46     | 54     | 57     | 58     |
|                               | 34     | 36     | 38     | 42     | 49     | 56     | 63     |
|                               | 32     | 37     | 38     | 42     | 49     | 56     | 61     |
|                               | 33     | 33     | 35     | 36     | 39     | 41     | 46     |
| mean                          | 33.500 | 36.250 | 38.250 | 41.500 | 47.750 | 52.500 | 57.000 |
| st dev                        | 1.291  | 2.500  | 2.872  | 4.123  | 6.292  | 7.681  | 7.616  |
| st error                      | 0.745  | 1.443  | 1.658  | 2.380  | 3.632  | 4.435  | 4.397  |
| G0-Treated Swiss Webster Mice |        |        |        |        |        |        |        |
|                               | Da0    | Da5    | Da10   | Da26   | Da47   | Da60   | Da93   |
|                               | 34     | 34     | 36     | 41     | 47     | 47     | 59     |
|                               | 34     | 36     | 37     | 41     | 47     | 50     | 54     |
|                               | 36     | 37     | 39     | 41     | 44     | 46     | 49     |
|                               | 33     | 35     | 36     | 41     | 44     | 51     | 56     |
| mean                          | 34.250 | 35.500 | 37.000 | 41.000 | 45.500 | 48.500 | 54.500 |
| st dev                        | 1.258  | 1.291  | 1.414  | 0.000  | 1.732  | 2.380  | 4.203  |
| st error                      | 0.726  | 0.745  | 0.816  | 0.000  | 1.000  | 1.374  | 2.427  |
| Gd-Treated Swiss Webster Mice |        |        |        |        |        |        |        |
|                               | Da0    | Da5    | Da10   | Da26   | Da47   | Da60   | Da93   |
|                               | 33     | 35     | 37     | 44     | 47     | 52     | 56     |
|                               | 35     | 36     | 39     | 44     | 48     | 52     | 54     |
|                               | 34     | 35     | 36     | 40     | 49     | 50     | 57     |
|                               | 32     | 33     | 37     | 40     | 41     | 47     | 49     |
| mean                          | 33.500 | 34.750 | 37.250 | 42.000 | 46.250 | 50.250 | 54.000 |
| st dev                        | 1.291  | 1.258  | 1.258  | 2.309  | 3.594  | 2.363  | 3.559  |
| st error                      | 0.745  | 0.726  | 0.726  | 1.333  | 2.075  | 1.364  | 2.055  |

|                |        |       |       |       |        |        |        |
|----------------|--------|-------|-------|-------|--------|--------|--------|
| Anova p value* | 0.6467 | 0.517 | 0.655 | 0.876 | 0.7594 | 0.5277 | 0.7132 |
|----------------|--------|-------|-------|-------|--------|--------|--------|

\* Anova test to compare the mean among the three groups at the corresponding days

No need to run the post-hoc test since none of the Anova test results is significant.

**Supplemental Table S8: Raw data and statistical significance testing for fig. S5. Fig.S5B** shows the effect of distal injection of 1,4-DPCA in hydrogel. Two ears from normal mice were analyzed and data is shown as the values from each ear. Ears from three groups of treated mice (n=6) were measured for changes in ear hole diameter over 38 days. ANOVA analysis shows highly significant differences between  $G_0$  vs  $G_{d2}$  and  $G_{d1}$  vs  $G_{d2}$  and no difference between  $G_0$  and  $G_{d1}$ . Figure S5C shows the long-term effects of 1,4-DPCA in hydrogel (n=4, N=2). ANOVA analysis shows no significant differences between groups.
